# Supplementary material for: Bicaudal C, a novel regulator of Dvl signaling abutting RNA-processing bodies, controls cilia orientation and leftward flow
Source: Oxford University Press journal article supplement (doi:10.1242/dev.038174), 2009-08-07
Supplement: dev038174tables.pdf [file dev038174tables.pdf]

**Table S1. Genotype of newborn progeny obtained from *Bicc1*<sup>+/-</sup> intercrosses**

|          | +/+ | +/- | -/-  | Missing* |
|----------|-----|-----|------|----------|
| <i>n</i> | 70  | 134 | 34   | (34)     |
| %        | 26  | 49  | 12.5 | (12.5)   |

\*Number of *Bicc1*<sup>-/-</sup> mutants estimated by a Mendelian distribution to have died in utero.

**Table S2. Altered gene expression patterns of *Xnr1* and *Pitx2c* in xBicC MO1/2 morphant *Xenopus* tadpoles**

| Injection          | <i>n</i> | <i>Xnr1</i> expression pattern |   |    |        | <i>P</i> -value   | Significance     |
|--------------------|----------|--------------------------------|---|----|--------|-------------------|------------------|
|                    |          | l                              | r | bi | absent |                   |                  |
| Uninjected         | 152      | 150                            | 0 | 2  | 0      | 0.634             | ns               |
| DsRed              | 17       | 17                             | 0 | 0  | 0      |                   |                  |
| Co-MO              | 66       | 65                             | 0 | 1  | 0      |                   |                  |
| xBicC MO1/2 2 pmol | 61       | 55                             | 0 | 4  | 2      | 0.0401            | ns <sup>†</sup>  |
| xBicC MO1/2 4 pmol | 99       | 45                             | 1 | 7  | 46     | <10 <sup>-3</sup> | *** <sup>†</sup> |

  

| Injection          | <i>n</i> | <i>Pitx2c</i> expression pattern |   |    |        | <i>P</i> -value   | Significance |
|--------------------|----------|----------------------------------|---|----|--------|-------------------|--------------|
|                    |          | l                                | r | bi | absent |                   |              |
| Uninjected         | 187      | 186                              | 0 | 0  | 1      | 0.7369            | ns           |
| DsRed              | 21       | 21                               | 0 | 0  | 0      |                   |              |
| Co-MO              | 81       | 76                               | 0 | 4  | 1      |                   |              |
| xBicC MO1/2 4 pmol | 84       | 54                               | 3 | 3  | 24     | <10 <sup>-3</sup> | ***          |

Embryos were injected into the dorsal marginal zone at the four-cell stage with mRNA encoding the lineage tracer DsRed, a control morpholino oligonucleotide (Co-MO), or a mixture of two morpholino oligonucleotides targeting *xBicC* (xBicC MO1/2) at the indicated amounts per embryo. Embryos were cultured to stage 22 for examination of *Xnr1* transcription (number of experiments, *n*=7) or stage 34 for in situ hybridization with a *Pitx2c* specific probe (*n*=6). Statistical significance was calculated by comparison of control and treated groups using Pearson's chi-square test in Statistica (StatSoft, Hamburg, Germany). ns, not significant; \*\*\*, very highly significant; †, Bonferroni-corrected.
